# Supplementary material
Source: MDPI journal article supplement (https://www.mdpi.com/1424-8247/15/3/266)
Supplement: s1 [file s1]

# Effect of caffeine and flavonoids on the binding of tigecycline to HSA: A spectroscopic study and molecular docking

Miroslav Sovrlić<sup>1</sup>, Emina Mrkalić<sup>2,\*</sup>, Ratomir Jelić<sup>1</sup>, Marina Ćendić Serafinović<sup>3</sup>, Stefan Stojanović<sup>1</sup>, Nevena Prodanović<sup>1</sup>, Jovica Tomović<sup>1</sup>

<sup>1</sup> Department of Pharmacy, Faculty of Medical Sciences, University of Kragujevac, Svetozara Markovića 69, Kragujevac 34000, Serbia; msovrlic@medf.kg.ac.rs

<sup>2</sup> Department of Science, Institute for Information Technologies, University of Kragujevac, Jovana Cvijića bb, Kragujevac 34000, Serbia; emina.mrkalic@pmf.kg.ac.rs

<sup>3</sup> Department of Chemistry, Faculty of Science, University of Kragujevac, Radoja Domanovića 12, Kragujevac 34000, Serbia; marina.cendic@pmf.kg.ac.rs

\*Correspondence: emina.mrkalic@pmf.kg.ac.rs (E.M)

## Supplementary material

### Content

|      |                                                                                                                            |   |
|------|----------------------------------------------------------------------------------------------------------------------------|---|
| 1.1. | <b>Figure S1-3</b> UV–Vis spectra of HSA-TGC in the presence of <b>ALK</b> and <b>FLAVs</b>                                | 2 |
| 1.2. | <b>Figure S4.</b> Fluorescence emission spectra of <b>HSA-TGC-CAT</b> system                                               | 3 |
| 1.3. | <b>Figure S5.</b> Fluorescence emission spectra of <b>HSA-TGC-DIO</b> system                                               | 4 |
| 1.4. | <b>Figure S6.</b> Stern-Volmer plots of the fluorescence quenching of <b>HSA-TGC</b> system by <b>ALK</b> and <b>FLAVs</b> | 4 |
| 1.5. | <b>Figure S7.</b> Synchronous fluorescence emission spectra of <b>HSA-TGC-CAF</b> system                                   | 5 |
| 1.6. | <b>Figure S8.</b> Synchronous fluorescence emission spectra of <b>HSA-TGC-CAT</b> system                                   | 5 |
| 1.7. | <b>Figure S9.</b> Synchronous fluorescence emission spectra of <b>HSA-TGC-DIO</b> system                                   | 6 |
| 1.8. | <b>Figure S10.</b> FT–IR spectra of <b>HSA</b> in presence and absence of <b>TGC</b> and <b>CAT</b>                        | 6 |

## 1.1. UV-Vis spectra of HSA-TGC in the presence of ALK and FLAVs

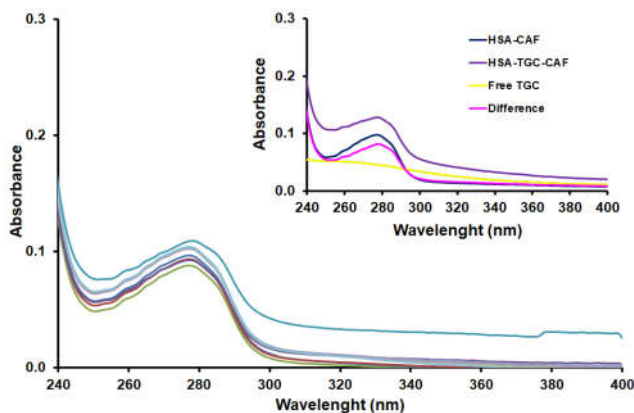

**Figure S1.** UV-Vis absorption spectra of HSA-CAF (1:1) in the absence and presence of increasing amounts of TGC (T = 298 K, pH = 7.4). [HSA] = 2  $\mu$ M; [CAF] = 2  $\mu$ M; [TGC] = 0 to  $1 \times 10^{-5}$  M. Inset: absorption spectrum of HSA-CAF; absorption spectrum of TGC only; absorption spectrum of HSA-TGC-CAF (1:2:1) complex; difference between absorption spectrum of HSA-TGC-CAF complex and free TGC.

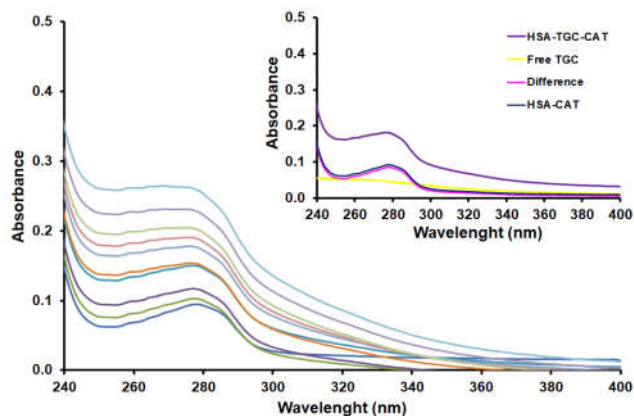

**Figure S2.** UV-Vis absorption spectra of HSA-CAT (1:1) in the absence and presence of increasing amounts of TGC (T = 298 K, pH = 7.4). [HSA] = 2  $\mu$ M; [CAT] = 2  $\mu$ M; [TGC] = 0 to  $1 \times 10^{-5}$  M. Inset: absorption spectrum of HSA-CAT; absorption spectrum of TGC only; absorption spectrum of HSA-TGC-CAT (1:2:1) complex; difference between absorption spectrum of HSA-TGC-CAT complex and free TGC.

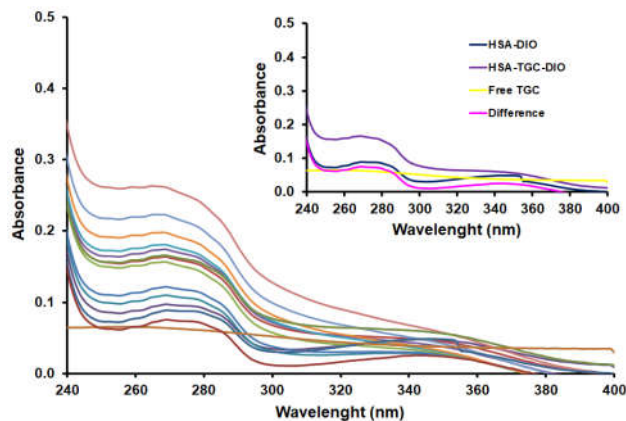

**Figure S3.** UV-Vis absorption spectra of HSA-DIO (1:1) in the absence and presence of increasing amounts of TGC ( $T = 298\text{ K}$ ,  $\text{pH} = 7.4$ ).  $[\text{HSA}] = 2\text{ }\mu\text{M}$ ;  $[\text{DIO}] = 2\text{ }\mu\text{M}$ ;  $[\text{TGC}] = 0$  to  $1 \times 10^{-5}\text{ M}$ . Inset: absorption spectrum of HSA-DIO; absorption spectrum of TGC only; absorption spectrum of HSA-TGC-DIO (1:2:1) complex; difference between absorption spectrum of HSA-TGC-DIO complex and free TGC.

## 1.2. Fluorescence emission spectra of HSA-TGC-CAT system

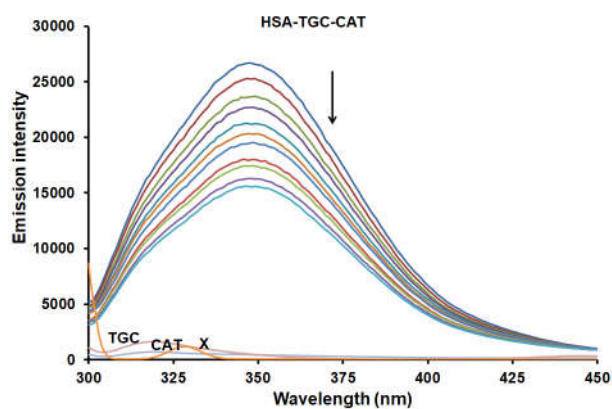

**Figure S4.** Fluorescence emission spectra of HSA-TGC ( $T = 298\text{ K}$ ,  $\text{pH} = 7.4$ ) in the presence of CAT.  $[\text{HSA}] = 2\text{ }\mu\text{M}$ ,  $[\text{CAT}] = 2\text{ }\mu\text{M}$  and  $[\text{TGC}] = 0$  to  $1 \times 10^{-5}\text{ M}$ . X represents buffer only.

### 1.3. Fluorescence emission spectra of HSA-TGC-DIO system

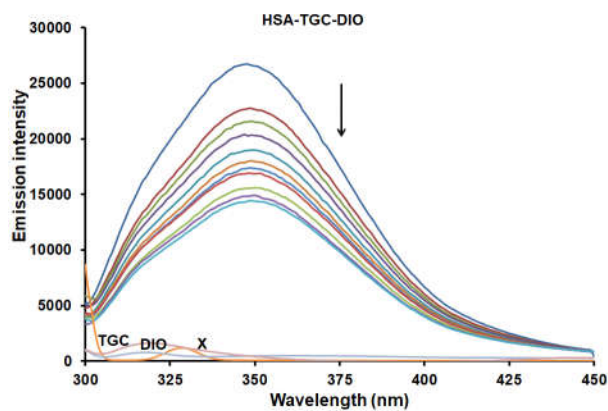

**Figure S5.** Fluorescence emission spectra of HSA-TGC (T = 298 K, pH = 7.4) in the presence of DIO. [HSA] = 2  $\mu$ M, [DIO] = 2  $\mu$ M and [TGC] = 0 to 1  $\times 10^{-5}$  M. X represents buffer only.

### 1.4. Stern-Volmer plots of the fluorescence quenching of HSA-TGC system by ALK and FLAVs

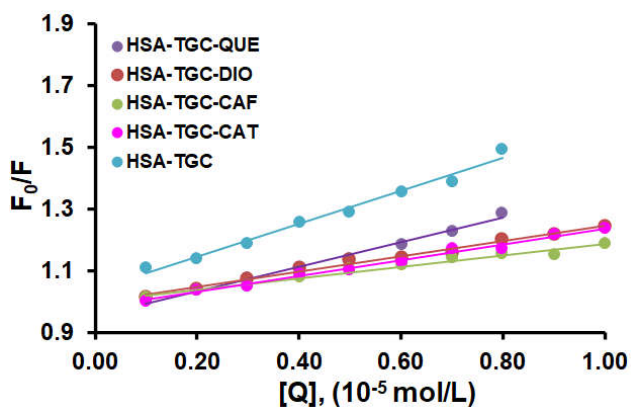

**Figure S6.** Stern-Volmer plots of the of the fluorescence quenching of HSA by TGC in the presence of CAF/FLAVs (QUE, CAT and DIO) at 298 K

### 1.5. Synchronous fluorescence emission spectra of HSA-TGC-CAF system

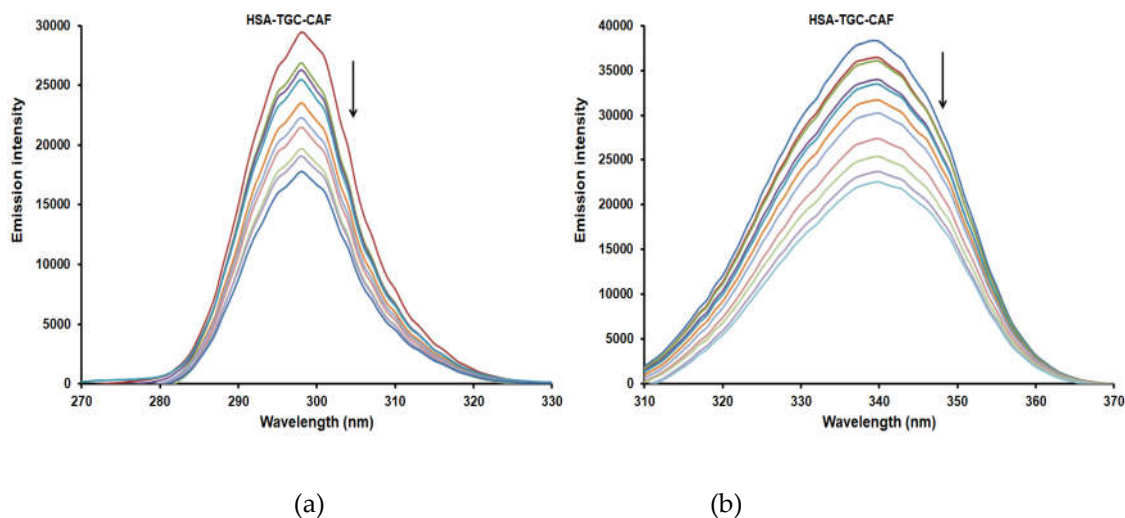

**Figure S7.** The effect of CAF on the synchronous fluorescence emission spectra of HSA-TGC system ( $T = 298$  K,  $\text{pH} = 7.4$ ): a)  $\Delta\lambda=15$  nm and b)  $\Delta\lambda=60$  nm.  $[\text{HSA}] = 2 \mu\text{M}$ ,  $[\text{CAF}] = 2 \mu\text{M}$  and  $[\text{TGC}] = 0$  to  $1 \times 10^{-5}$  M.

### 1.6. Synchronous fluorescence emission spectra of HSA-TGC-CAT system

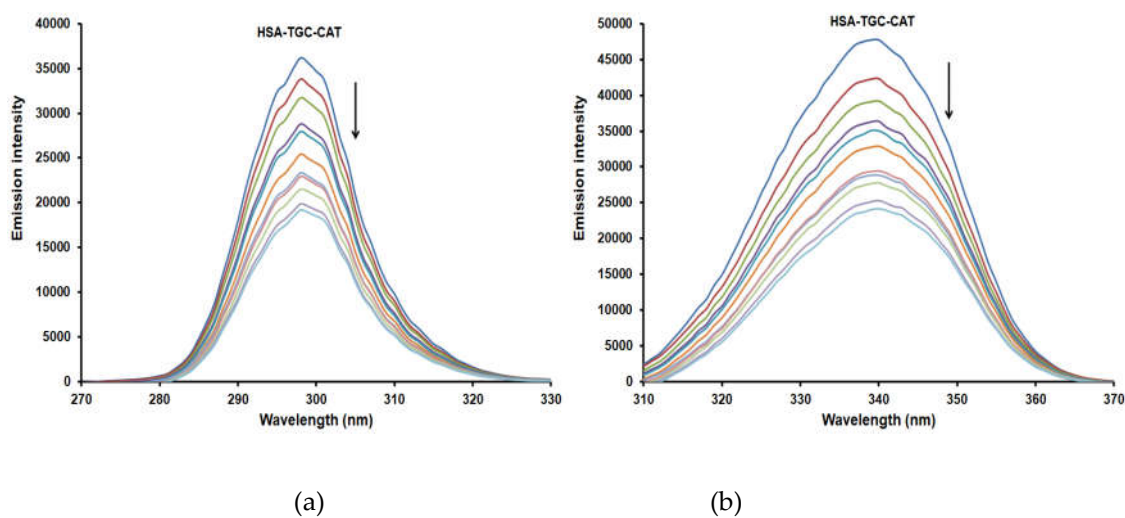

**Figure S8.** The effect of CAT on the synchronous fluorescence emission spectra of HSA-TGC system ( $T = 298$  K,  $\text{pH} = 7.4$ ): a)  $\Delta\lambda=15$  nm and b)  $\Delta\lambda=60$  nm.  $[\text{HSA}] = 2 \mu\text{M}$ ,  $[\text{CAT}] = 2 \mu\text{M}$  and  $[\text{TGC}] = 0$  to  $1 \times 10^{-5}$  M.

### 1.7. Synchronous fluorescence emission spectra of HSA-TGC-DIO system

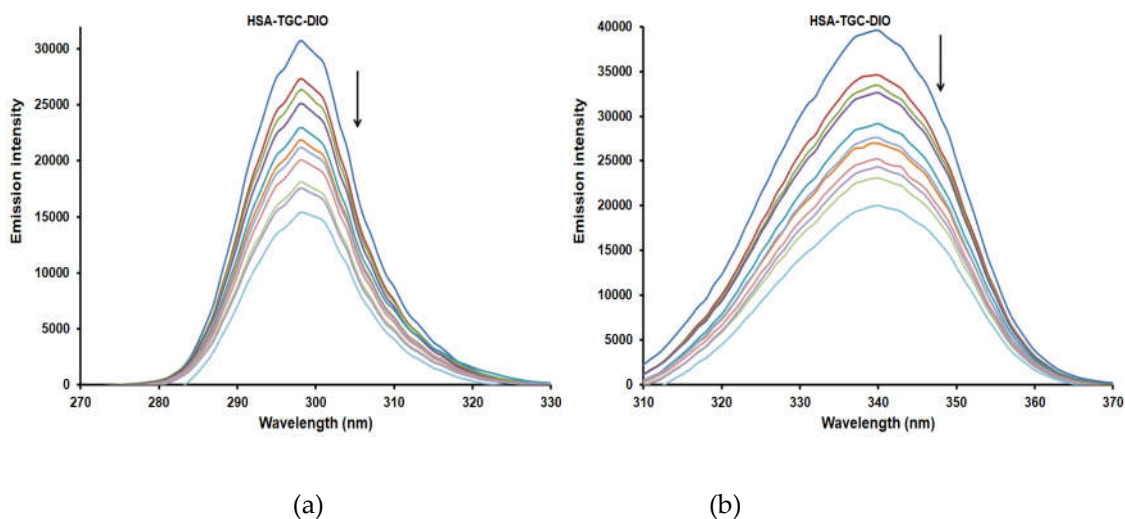

**Figure S9.** The effect of DIO on the synchronous fluorescence emission spectra of HSA-TGC system ( $T = 298$  K,  $\text{pH} = 7.4$ ): a)  $\Delta\lambda = 15$  nm and b)  $\Delta\lambda = 60$  nm.  $[\text{HSA}] = 2 \mu\text{M}$ ,  $[\text{DIO}] = 2 \mu\text{M}$  and  $[\text{TGC}] = 0$  to  $1 \times 10^{-5}$  M.

### 1.8. FT-IR spectra of HSA in presence and absence of TGC and CAT

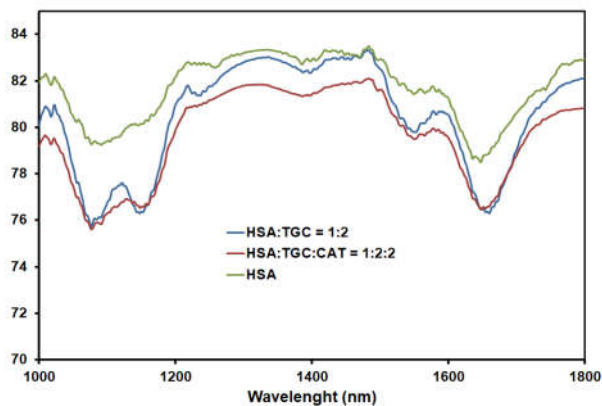

**Figure S10.** FT-IR spectra (wavenumber = 1000–1800  $\text{cm}^{-1}$ ) for HSA (2  $\mu\text{M}$ ) in presence and absence of TGC and CAT (4  $\mu\text{M}$ )
